# Supplementary material for: Catechol exerts anin situsurface oxygen vacancy effect on BiOI: an innovative signal transduction mode for cathodic photoelectrochemistry
Source: Royal Society of Chemistry journal article supplement (doi:10.1039/d3tb00566f), 2023-01-01
Supplement: d3tb00566f1.pdf [file d3tb00566f1.pdf]

## Supporting Information

### **Catechol exerts *in situ* surface oxygen vacancy effect on BiOI: an innovative signal transduction mode for cathodic photoelectrochemistry**

Hong Wang,<sup>‡a</sup> Mengmeng Gu,<sup>‡a</sup> Menghua Yan,<sup>a</sup> Xiuming Wu,<sup>a</sup> Yuming Dong<sup>a</sup> and Guang-Li Wang<sup>\*a,b</sup>

<sup>a</sup>Key Laboratory of Synthetic and Biological Colloids (Ministry of Education), School of Chemical and Material Engineering, Jiangnan University, Wuxi 214122, China

<sup>b</sup>Shandong Key Laboratory of Biochemical Analysis, College of Chemistry and Molecular Engineering, Qingdao University of Science and Technology, Qingdao 266042, China

<sup>‡</sup>These authors contributed equally to this work.

\*Corresponding author: Guang-Li Wang

\*E-mail: glwang@jiangnan.edu.cn

## Table of contents

|                                                                                                 |
|-------------------------------------------------------------------------------------------------|
| <b>Experimental section</b>                                                                     |
| <b>Fig. S1</b> XRD pattern and SEM image of BiOI.                                               |
| <b>Fig. S2</b> Optimization of conditions for PEC detection.                                    |
| <b>Fig. S3</b> Color changes of BiOI before and after reaction with CA.                         |
| <b>Fig. S4</b> XPS spectra of BiOI before and after reaction with CA.                           |
| <b>Fig. S5</b> Effect of dissolved oxygen on photocurrent response.                             |
| <b>Table S1.</b> Excited state lifetimes of BiOI before and after reaction with CA.             |
| <b>Fig. S6</b> Optimization of conditions for the enzyme-catalyzed reaction of TYR.             |
| <b>Fig. S7</b> Photocurrent responses of BiOI to different concentrations of TYR.               |
| <b>Table S2.</b> Comparison with different methods for the detection of TYR.                    |
| <b>Fig. S8</b> UV-Vis absorption spectra of the Au NPs/TYR/Magainin I-C bioconjugates.          |
| <b>Fig. S9</b> Optimization of immunoassay conditions.                                          |
| <b>Table S3.</b> Comparison with different methods for the detection of <i>E. coli</i> O157:H7. |
| <b>Table S4.</b> Recovery of <i>E. coli</i> O157:H7 in milk sample.                             |
| <b>Table S5.</b> Comparison of the proposed PEC assay and ELISA kit.                            |

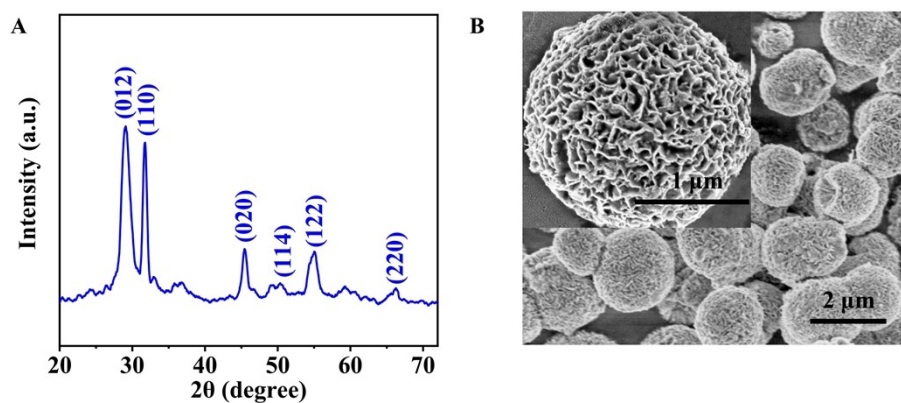

**Fig. S1** (A) XRD pattern and (B) SEM image of BiOI.

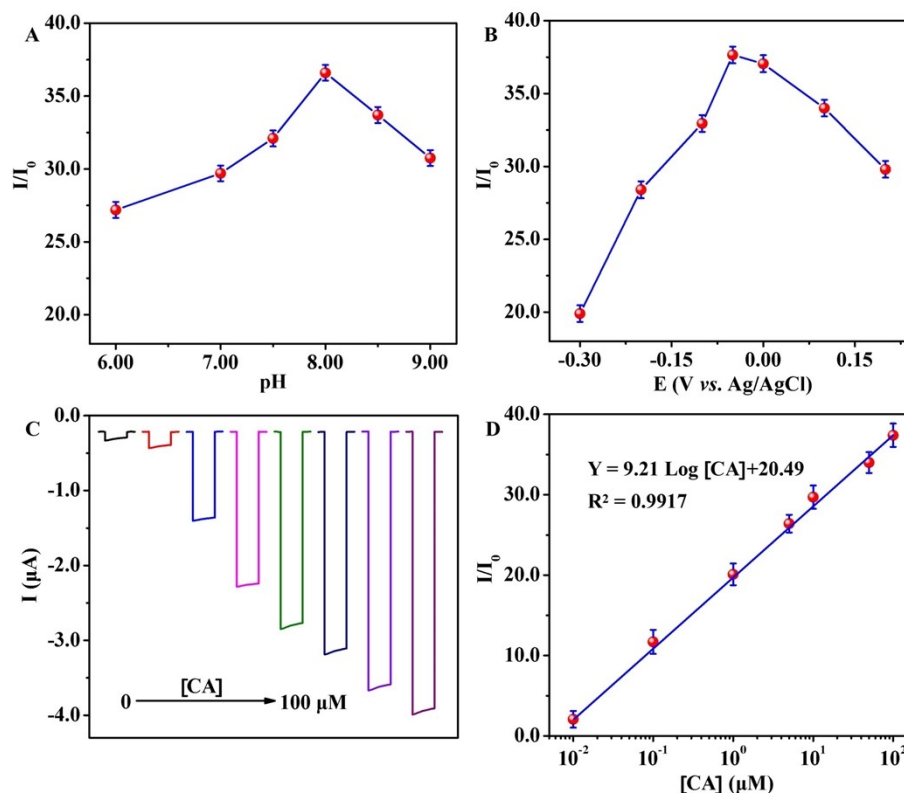

**Fig. S2** (A) The effect of test buffer medium pH, and (B) applied bias on photocurrents of BiOI modified electrode to CA (10.0 μM). (C) Photocurrents of BiOI modified electrode when incubated with different concentrations of CA (from left to right, 0.0, 0.01, 0.1, 1.0, 5.0, 10.0, 50.0, and 100.0 μM). (D) The corresponding calibration curve of the photocurrent change ( $I/I_0$ ) with CA concentrations on a logarithmic scale.

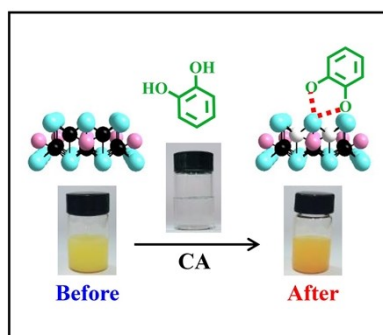

**Fig. S3** The color changes of BiOI before and after reaction with CA.

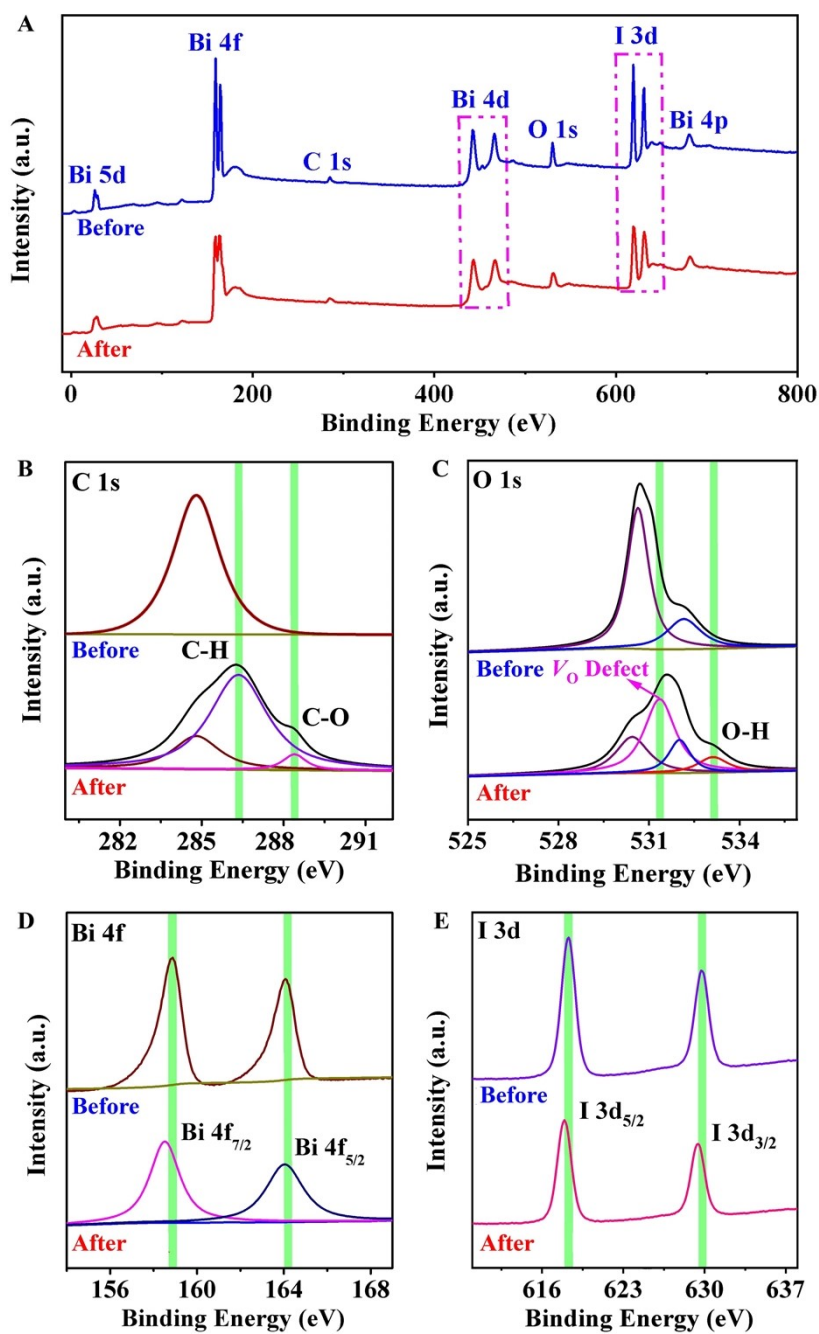

**Fig. S4** (A) Survey XPS spectra of BiOI before and after reaction with CA, and corresponding high-resolution XPS spectra of (B) C 1s, (C) O 1s, (D) Bi 4f, and (E) I 3d.

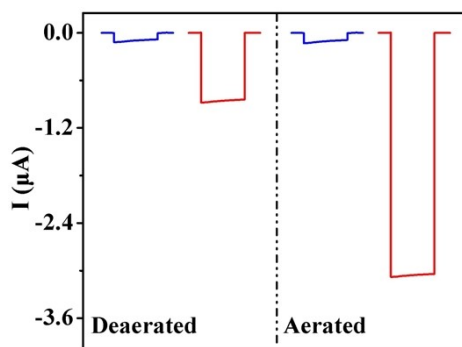

**Fig. S5** Photocurrent responses of BiOI modified electrode before (blue line) and after (red line) reaction with 10.0  $\mu\text{M}$  of CA in deaerated or aerated solutions.

**Table S1.** Excited state lifetimes of BiOI before and after reaction with CA

| Sample | $B_1$   | $B_2$   | $\tau_1$ (ns) | $\tau_2$ (ns) | $\chi^2$ | $\tau_{\text{avg}}$ (ns) |
|--------|---------|---------|---------------|---------------|----------|--------------------------|
| Before | 5431.27 | 3029.61 | 1.51          | 4.06          | 1.15     | 3.04                     |
| After  | 5621.32 | 2719.36 | 2.03          | 5.24          | 1.01     | 3.81                     |

The fitting model is  $I(t) = B_1 e^{-t/\tau_1} + B_2 e^{-t/\tau_2}$ . The average fluorescence lifetime ( $\tau_{\text{avg}}$ ) is calculated according to the equation:  $\tau_{\text{avg}} = (B_1 \tau_1^2 + B_2 \tau_2^2) / (B_1 \tau_1 + B_2 \tau_2)$ , where B represent weighting parameter,  $\tau$  is decay time.

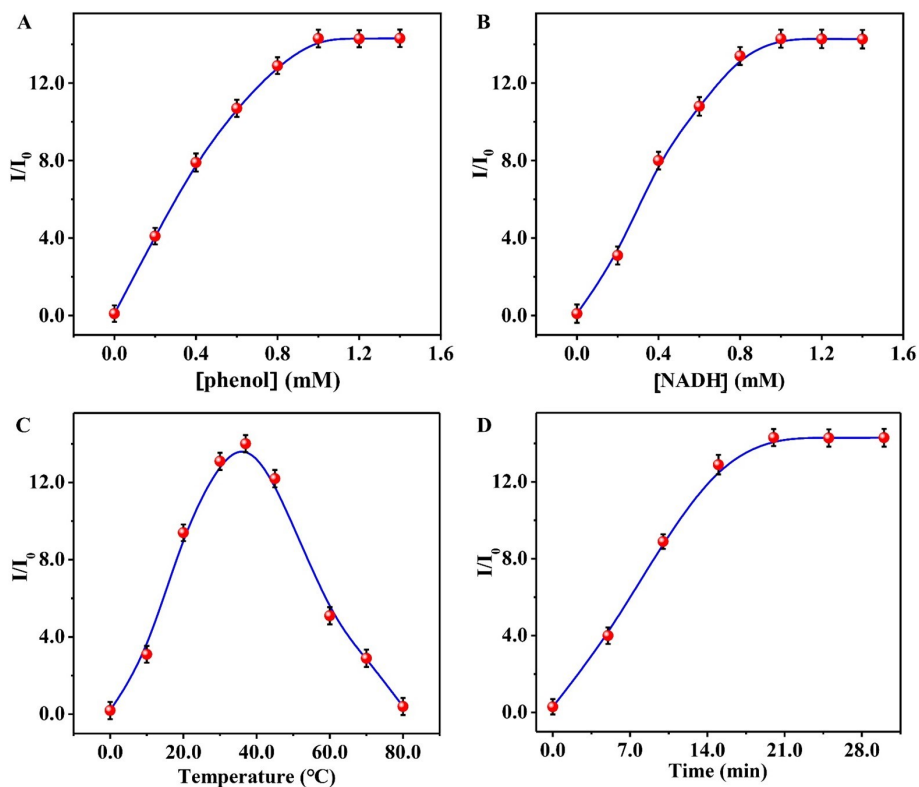

**Fig. S6** The optimization of the (A) phenol concentration, (B) NADH concentration, (C) reaction temperature, and

(D) reaction time of the bioreaction for the PEC detection of TYR. The concentration of TYR was 0.1 U/mL.

As shown in Fig. S6, when the phenol concentration was 1.0 mM, the NADH concentration was 1.0 mM, the reaction temperature was 37 °C, and the bioreaction time was 20 min, the maximal photocurrent responses of the PEC detection system for TYR were obtained.

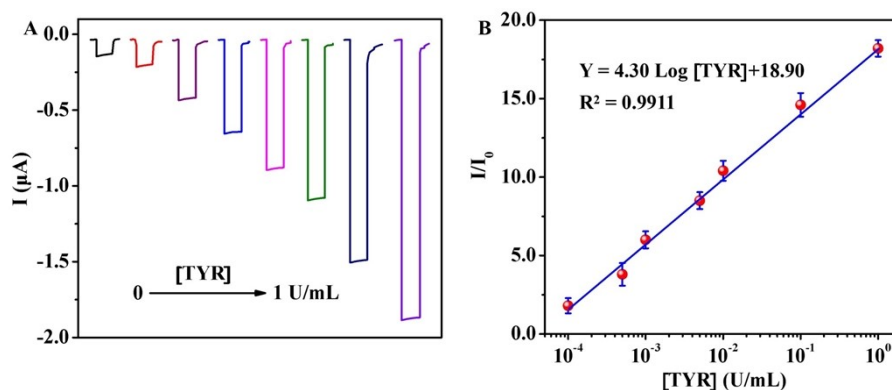

**Fig. S7** (A) Photocurrents of the BiOI modified electrode to different concentrations (0.0, 0.0001, 0.0005, 0.001, 0.005, 0.01, 0.1, and 1.0 U/mL) of TYR. (B) The corresponding calibration curve of the photocurrent increment ( $I/I_0$ ) with TYR concentrations on a logarithmic scale.

**Table S2.** Comparison with different methods for the detection of TYR

| Method | Material            | Linear range (U/mL)       | LOD (U/mL)           | Reference |
|--------|---------------------|---------------------------|----------------------|-----------|
| SERS   | <i>p</i> -TC/AuNPs  | 0.1–100.0                 | 0.07                 | [1]       |
| BL     | TYR/LH <sub>2</sub> | 0.1–200.0                 | 0.1                  | [2]       |
| FL     | Dopa/CQDs           | $2.3 \times 10^{-2}$ –0.8 | $7.0 \times 10^{-3}$ | [3]       |
| FL     | Au NCs              | $6.0 \times 10^{-3}$ –3.6 | $6.0 \times 10^{-3}$ | [4]       |
| PEC    | CdS NPs             | Not given                 | 0.1                  | [5]       |
| PEC    | BiOI                | $1.0 \times 10^{-4}$ –1.0 | $2.5 \times 10^{-5}$ | This work |

Note: FL: Fluorescence; BL: Bioluminescence; SERS: Surface-enhanced Raman scattering.

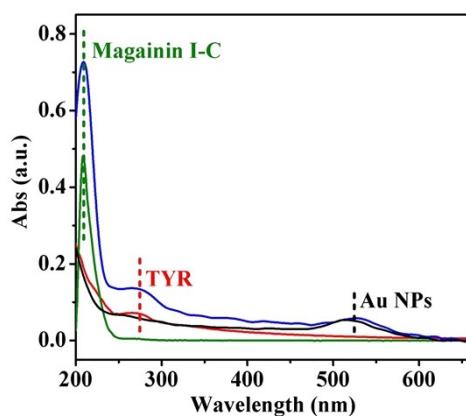

**Fig. S8** UV-Vis absorption spectra of various solutions: Au NPs (black line); TYR (red line); Magainin I-C (green line); Au NPs/TYR/Magainin I-C bioconjugates (blue line).

The characteristic absorption peaks for Au nanoparticles (NPs), TYR, and Magainin I-C could be seen in the Au NPs/TYR/Magainin I-C bioconjugates (Fig. S8), which confirmed that TYR and Magainin I-C were successfully fixed to Au NPs and subsequently used as catalytic label (for signify the detection) and recognition element for *E. coli* O157:H7.

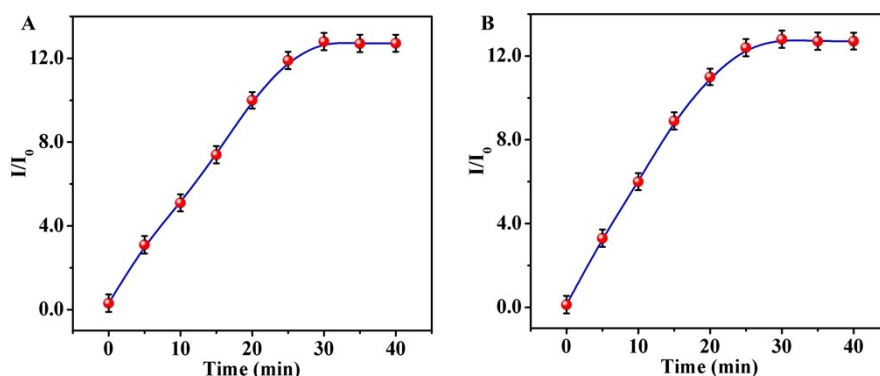

**Fig. S9** The effect of the incubation time of (A) *E. coli* O157:H7 and Magainin I, (B) *E. coli* O157:H7 and Au NPs/TYR/Magainin I-C bioconjugates on the responses of the PEC immunoassay. The concentration of *E. coli* O157:H7 was  $1.0 \times 10^5$  CFU/mL.

Similarly, as shown in Fig. S9, when both Magainin I and *E. coli* O157:H7, *E. coli* O157:H7 and Au NPs/TYR/Magainin I-C bioconjugates were incubated for 30 min, the best PEC detection results for *E. coli* O157:H7 were obtained.

**Table S3.** Comparison with different methods for the detection of *E. coli* O157:H7

| Method      | Material   | Linear range (CFU/mL)               | LOD (CFU/mL)      | Reference |
|-------------|------------|-------------------------------------|-------------------|-----------|
| Colorimetry | CNTs       | $1.0 \times 10^2 - 1.0 \times 10^5$ | $1.0 \times 10^2$ | [6]       |
| CL          | Luminol    | $4.3 \times 10^3 - 4.3 \times 10^5$ | $1.2 \times 10^3$ | [7]       |
| ECL         | Ru complex | $5.0 \times 10^2 - 5.0 \times 10^5$ | $1.2 \times 10^2$ | [8]       |
| EC          | Fe         | $1.0 \times 10^3 - 1.0 \times 10^7$ | $1.0 \times 10^3$ | [9]       |
| EC          | —          | $1.0 \times 10^3 - 1.0 \times 10^8$ | $1.0 \times 10^3$ | [10]      |
| EC          | AuNPs      | $1.0 \times 10^2 - 1.0 \times 10^5$ | $1.0 \times 10^2$ | [11]      |
| PEC         | BiOI       | $5.0 - 1.0 \times 10^6$             | 3.0               | This work |

CL: Chemiluminescence; ECL: Electrochemiluminescence; EC: Electrochemistry.

**Table S4.** Spiked recovery tests for *E. coli* O157:H7 in skim milk

| Spiked samples | Spiked <i>E. coli</i> O157:H7<br>(CFU/mL) | Found<br>(CFU/mL)  | Recovery<br>(%) |
|----------------|-------------------------------------------|--------------------|-----------------|
| 1              | 0.0                                       | Not found          | —               |
| 2              | 50.0                                      | 48.50              | 97.0            |
| 3              | $5.0 \times 10^3$                         | $5.17 \times 10^3$ | 103.4           |
| 4              | $5.0 \times 10^5$                         | $4.76 \times 10^5$ | 95.2            |

**Table S5.** Comparison of results for skim milk samples using the proposed PEC sensor and ELISA kit

| Spiked samples | Method; concentration:<br>mean $\pm$ SD (RSD) (CFU/ $\mu$ L, n=3) |                 | $t_{\text{exp}}$ |
|----------------|-------------------------------------------------------------------|-----------------|------------------|
|                | ELISA                                                             | PEC             |                  |
| 1              | 4.06 $\pm$ 0.23                                                   | 3.97 $\pm$ 0.27 | 1.01             |
| 2              | 4.52 $\pm$ 1.15                                                   | 4.61 $\pm$ 1.19 | 1.21             |
| 3              | 5.49 $\pm$ 0.63                                                   | 5.37 $\pm$ 0.59 | 0.97             |
| 4              | 5.73 $\pm$ 2.01                                                   | 5.79 $\pm$ 1.94 | 1.14             |
| 5              | 6.11 $\pm$ 1.41                                                   | 6.02 $\pm$ 1.48 | 0.89             |
| 6              | 6.54 $\pm$ 0.91                                                   | 6.61 $\pm$ 0.84 | 1.03             |
| 7              | 7.02 $\pm$ 0.33                                                   | 6.94 $\pm$ 0.28 | 1.64             |

## References

- [1] Lu. Wang, Z. F. Gan, D. Guo, H. L. Xia, F. T. Patrice, M. E. Hafez and D. W. Li, *Anal. Chem.*, 2019, **91**, 6507–6513.
- [2] S. Li, R. Hu, S. Q. Wang, X. D. Guo, Y. Zeng, Y. Li and G. Q. Yang, *Anal. Chem.*, 2018, **90**, 9296–9300.
- [3] L. J. Chai, J. Zhou, H. Feng, C. Tang, Y. Y. Huang and Z. S. Qian, *ACS Appl. Mater. Interfaces*, 2015, **7**, 23564–23574.
- [4] Y. Teng, X. F. Jia, J. Li and E. K. Wang, *Anal. Chem.*, 2015, **87**, 4897–4902.
- [5] H. B. Yildiz, R. Freeman, R. Gill and I. Willner, *Anal. Chem.*, 2008, **80**, 2811–2816.
- [6] H. Zhang, Y. P. Shi, F. Lan, Y. Pan, Y. K. Lin, J. Z. Lv, Z. H. Zhu, Q. Jiang and C. Q. Yi, *Chem. Commun.*, 2014, **50**, 1848–1850.
- [7] Y. Zhang, C. Tan, R. H. Fei, X. X. Liu, Y. Zhou, J. Chen, H. C. Chen, R. Zhou and Y. G. Hu, *Anal. Chem.*, 2014, **86**, 1115–1122.
- [8] Z. J. Li, H. Y. Yang, L. J. Sun, H. L. Qi, Q. Gao and C. X. Zhang, *Sens. Actuat. B: Chem.*, 2015, **210**, 468–474.
- [9] Y. X. Li, R. Afrasiabi, F. Fathi, N. Wang, C. L. Xiang, R. Love, Z. She and H. B. Kraatz, *Biosens. Bioelectron.*, 2014, **58**, 193–199.
- [10] M. R. Akanda, V. Tamilavan, S. Park, K. Jo, M. H. Hyun and H. Yang, *Anal. Chem.*, 2013, **85**, 1631–1636.
- [11] A. R. H. Abdel-Azzem Hassan, A. D. L. Escosura-Muñiz and A. Merkoçi, *Biosens. Bioelectron.*, 2015, **67**, 511–515.
